# Supplementary material for: Catalytically active lead(ii)–imidazolium coordination assemblies with diversified lead(ii) coordination geometries
Source: Royal Society of Chemistry journal article supplement (doi:10.1039/c5dt04409j), 2016-01-01
Supplement: c5dt04409j1.pdf [file c5dt04409j1.pdf]

## Supporting Information-II

### Catalytically Active Lead-Azolium Coordination Assemblies with Diversified Lead(II) Coordination Environments

Chatla Naga Babu,<sup>a</sup> Paladugu Suresh,<sup>a</sup> Katam Srinivas,<sup>a</sup> Arruri Sathyanarayana,<sup>a</sup> Natarajan Sampath<sup>b</sup> and Ganesan Prabusankar<sup>a\*</sup>

<sup>a</sup> Department of Chemistry, Indian Institute of Technology Hyderabad, ODF Campus, Yeddumailaram, Telangana, INDIA-502 205. Fax: +91 40 2301 6032; Tel: +91 40 2301 6089; E-mail: [prabu@iith.ac.in](mailto:prabu@iith.ac.in)

<sup>b</sup> School of Chemical and Biotechnology, SASTRA University, Tirumalaisamudram, Thanjavur, Tamil Nadu, INDIA-613 401.

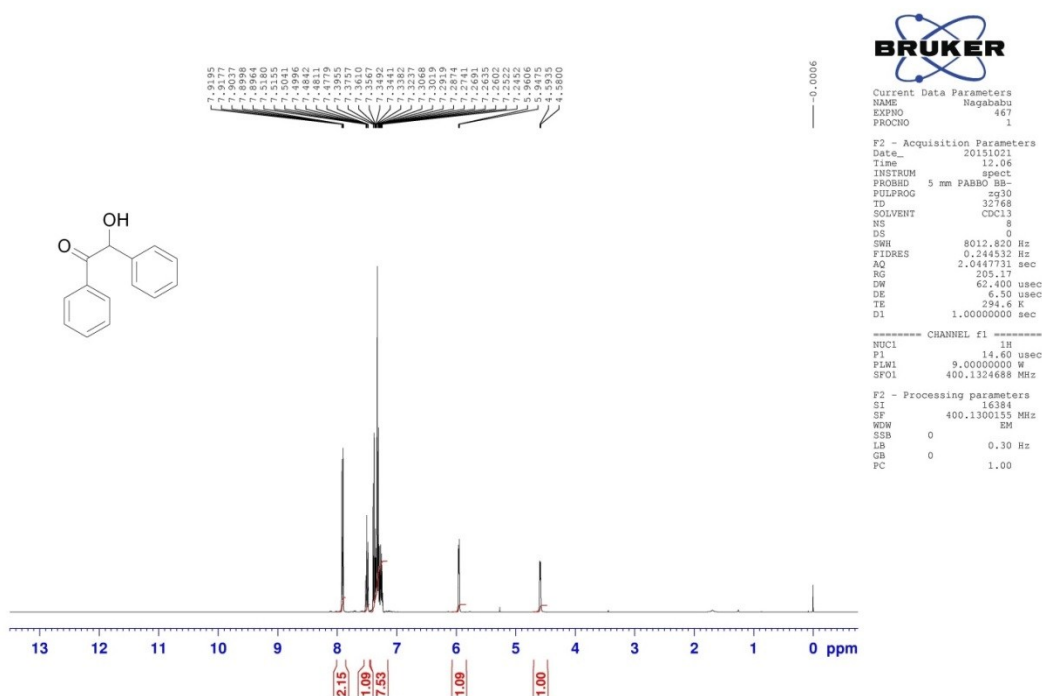

Figure S1. Table 2, Entry 1.

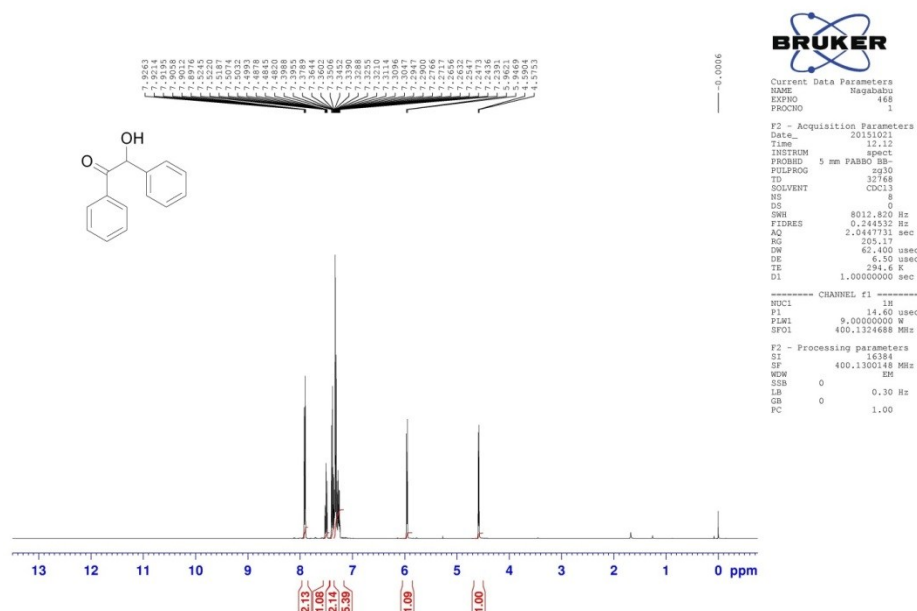

Figure S2. Table 2, Entry 2.

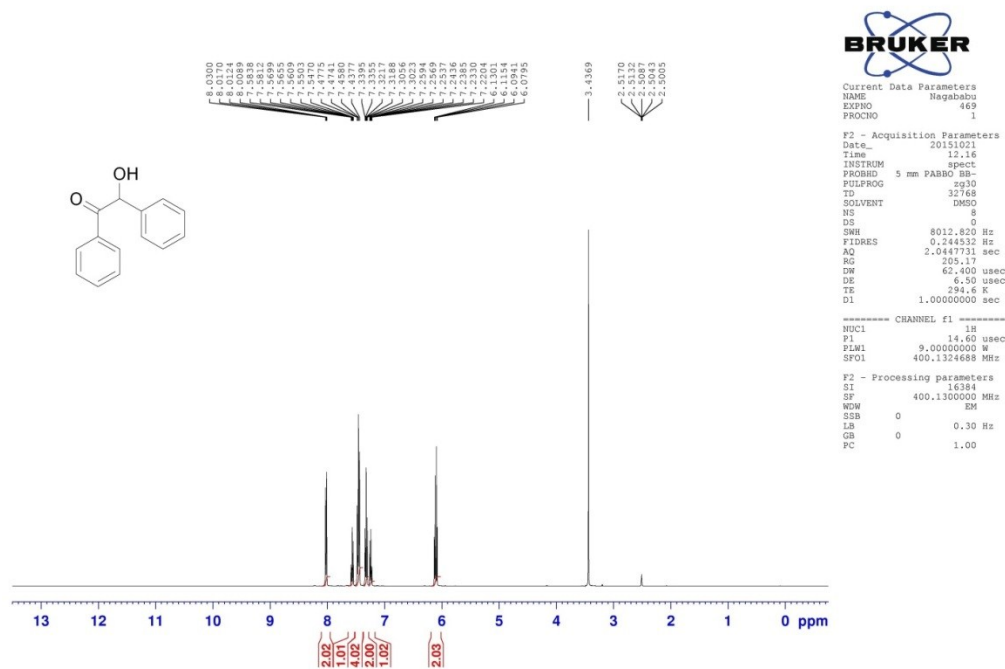

Figure S3. Table 2, Entry 3.

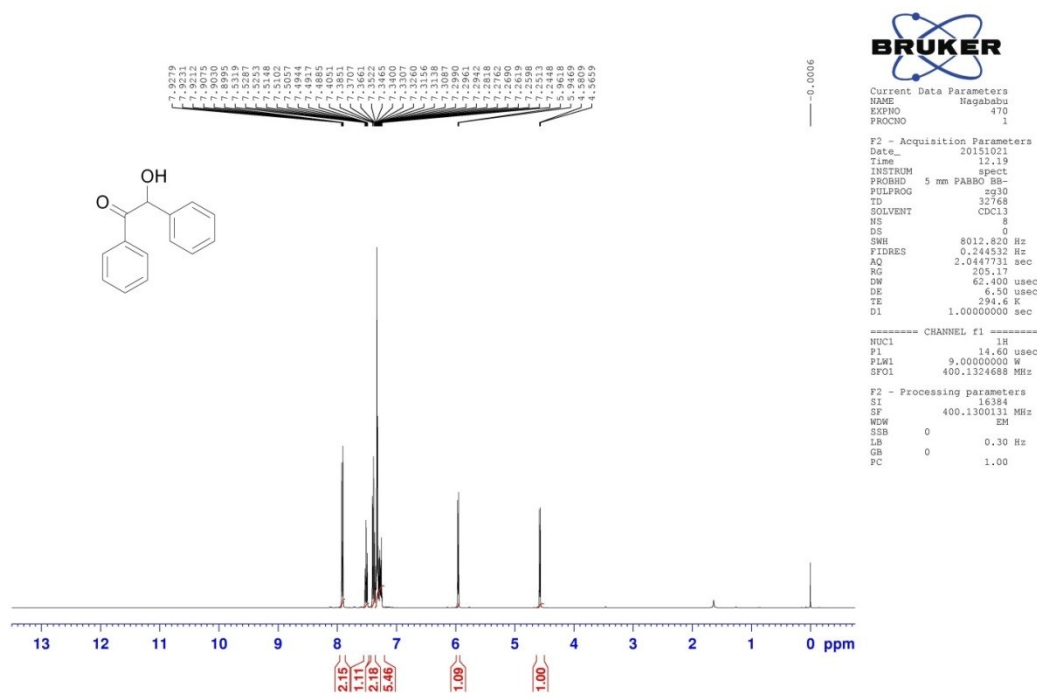



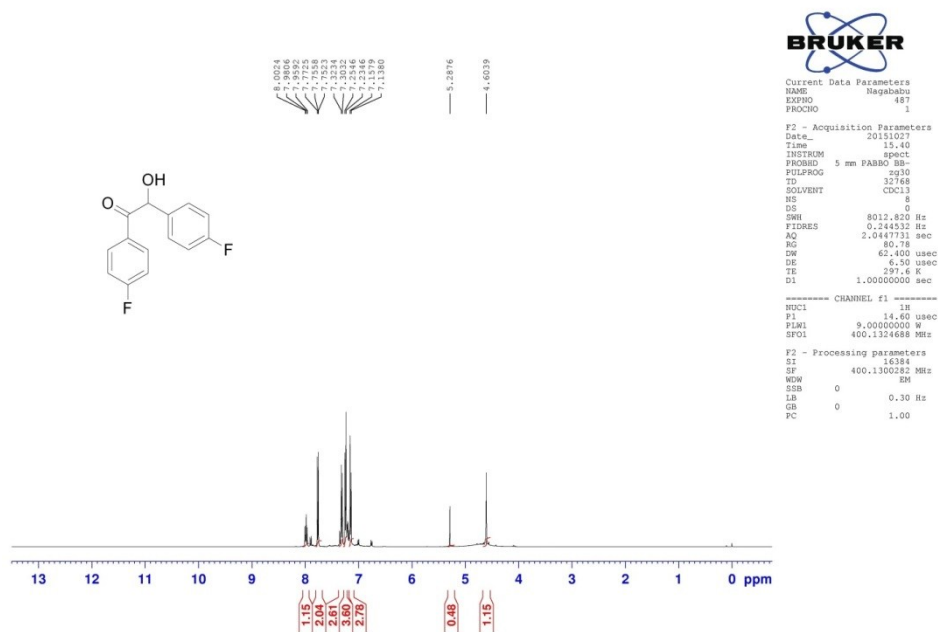

Figure S8. Table 3, Entry 3.

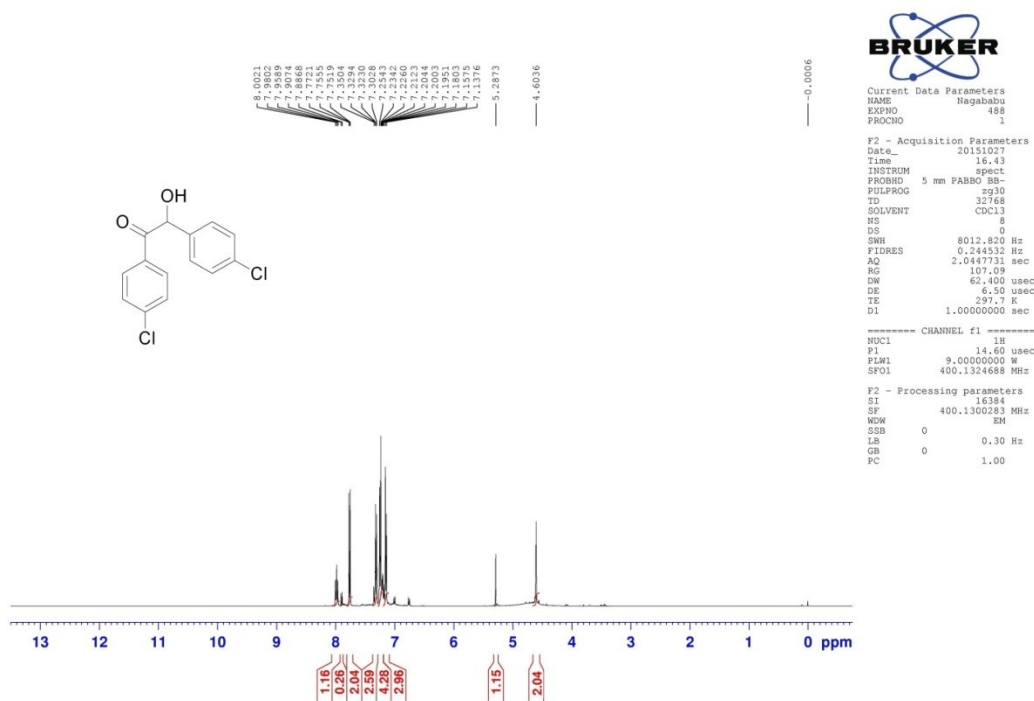

Figure S9. Table 3, Entry 4.

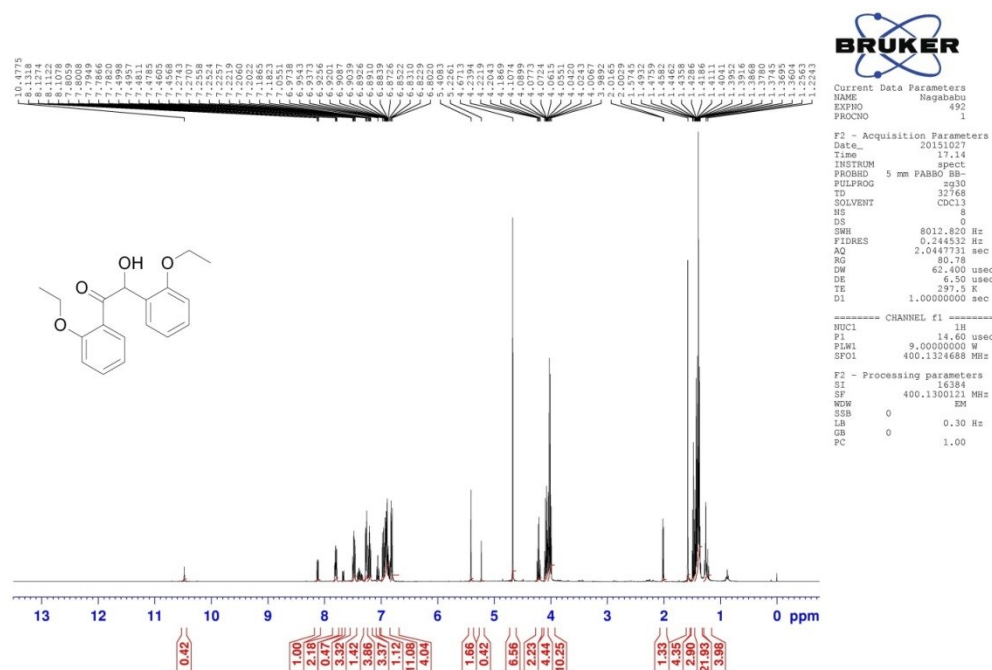

Figure S10. Table 3, Entry 5.

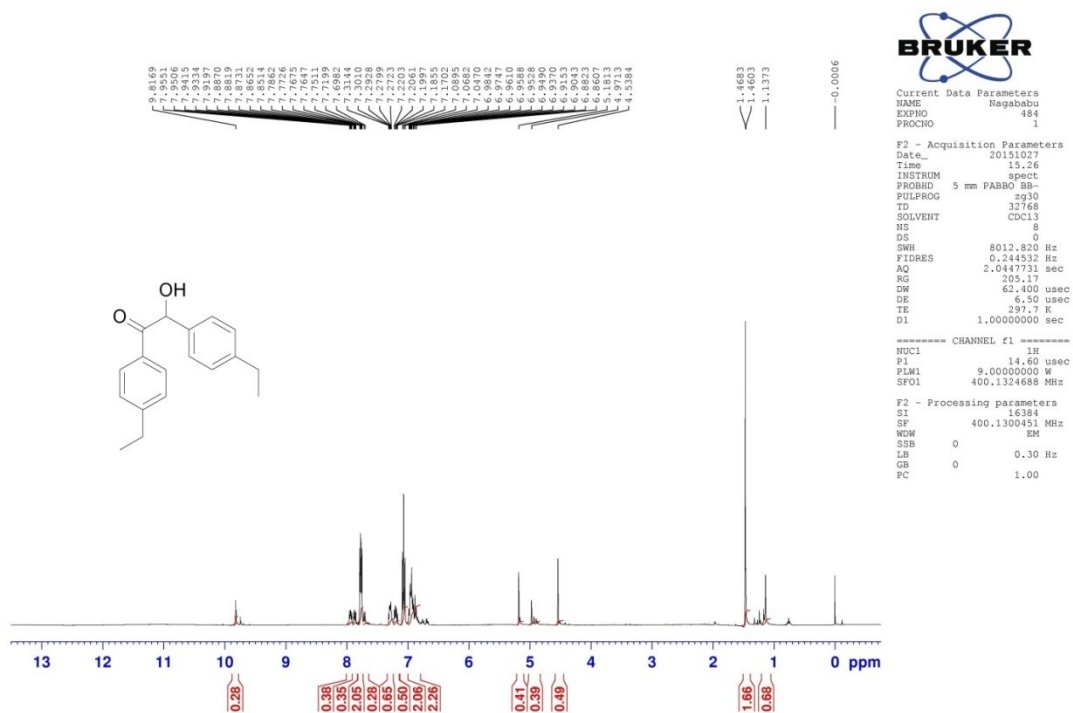

Figure S11. Table 3, Entry 6.

|               |                   |             |                      |                 |            |                        |                      |
|---------------|-------------------|-------------|----------------------|-----------------|------------|------------------------|----------------------|
| Sample Name   | GP-NB-98-2-H      | Position    | P1-A3                | Instrument Name | HRMS_Q-ToF | User Name              |                      |
| Inj Vol       | 0.1               | InjPosition |                      | SampleType      | Sample     | IRM Calibration Status | Success              |
| Data Filename | GP-NB-98-2-H-01.d | ACQ Method  | HRMS_Dual ESI_POS_SD | Comment         |            | Acquired Time          | 02-Nov-15 4:34:15 PM |

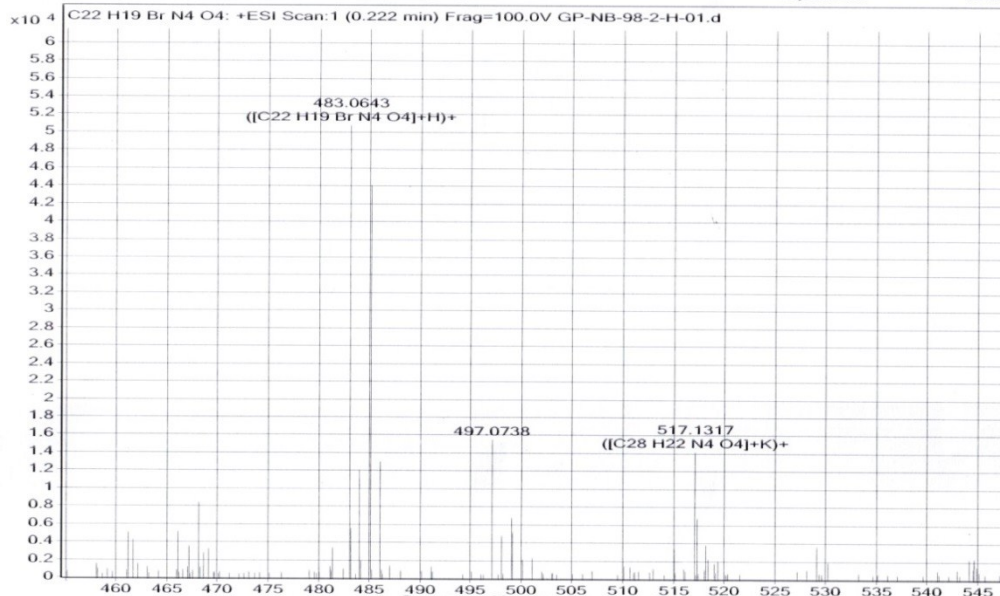

**Figure S12.** HRMS(+ESI) spectrum of L<sup>2</sup>H<sub>2</sub>Br<sub>2</sub>.

|               |                   |             |                      |                 |            |                        |                      |
|---------------|-------------------|-------------|----------------------|-----------------|------------|------------------------|----------------------|
| Sample Name   | GP-NB-98-2-H      | Position    | P1-A3                | Instrument Name | HRMS_Q-ToF | User Name              |                      |
| Inj Vol       | 0.1               | InjPosition |                      | SampleType      | Sample     | IRM Calibration Status | Success              |
| Data Filename | GP-NB-98-2-H-01.d | ACQ Method  | HRMS_Dual ESI_POS_SD | Comment         |            | Acquired Time          | 02-Nov-15 4:34:15 PM |

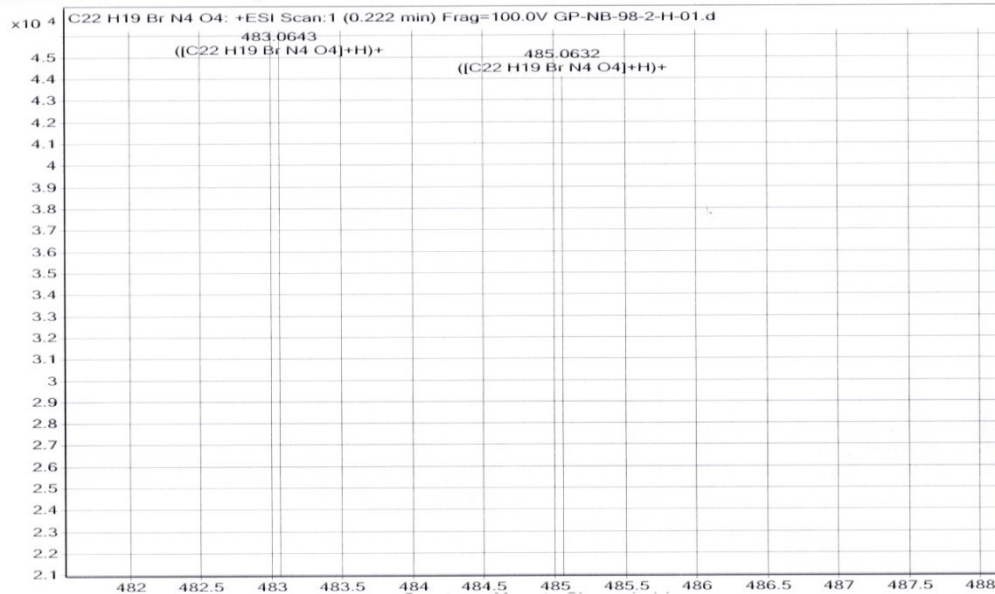

**Figure S13.** HRMS(+ESI) spectrum of L<sup>2</sup>H<sub>2</sub>Br<sub>2</sub>.

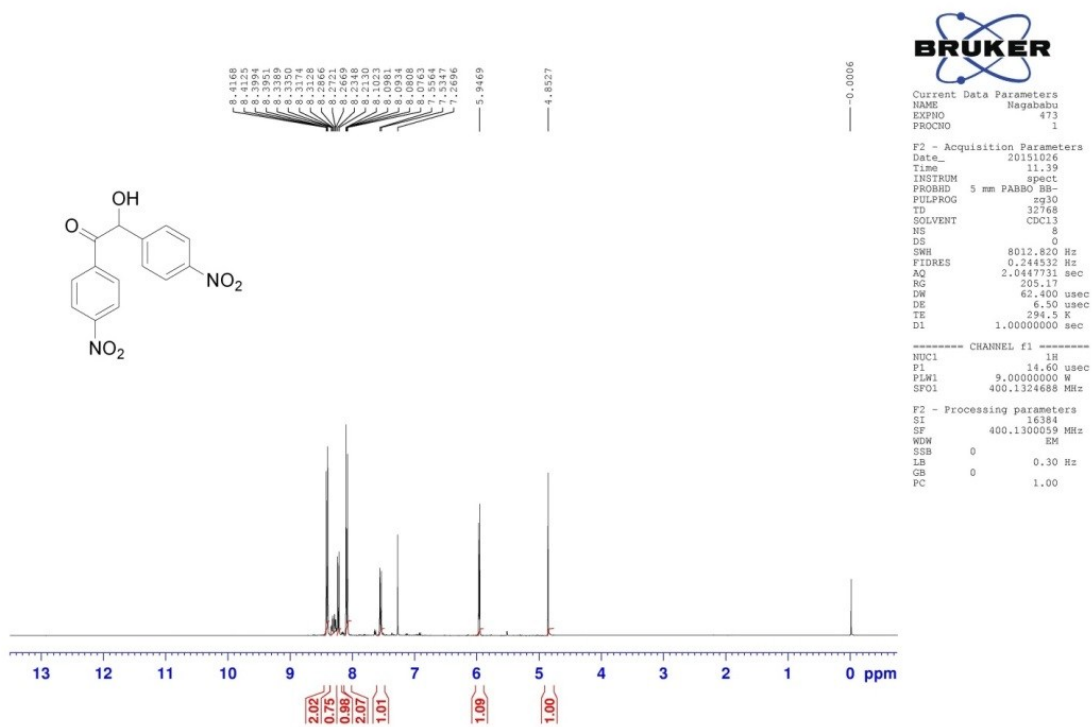

Figure S14. Table S2, Entry 1 First run.

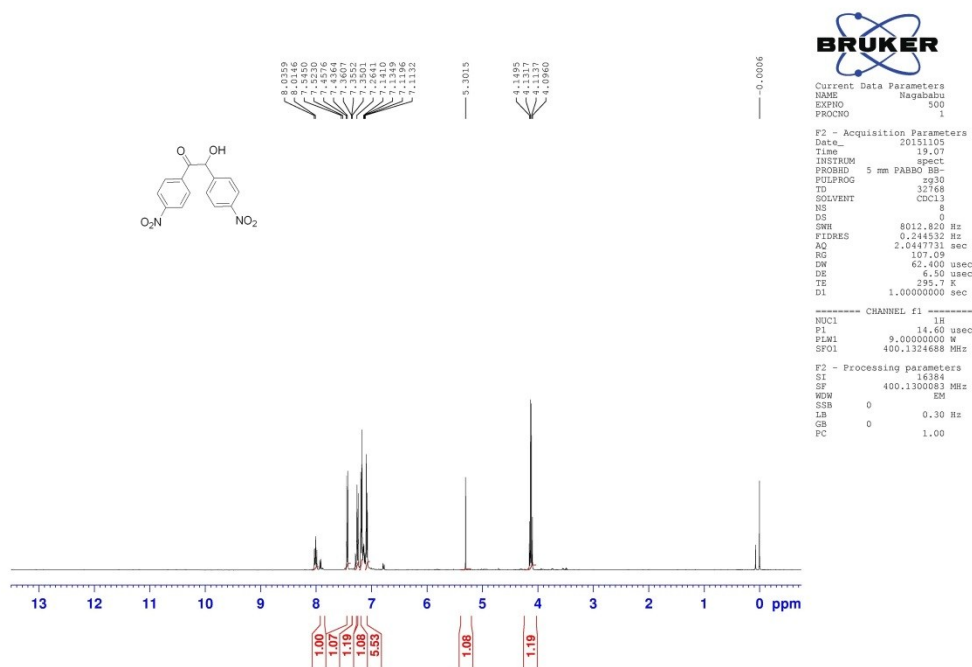

Figure S15. Table S2, Entry 1 Second run.



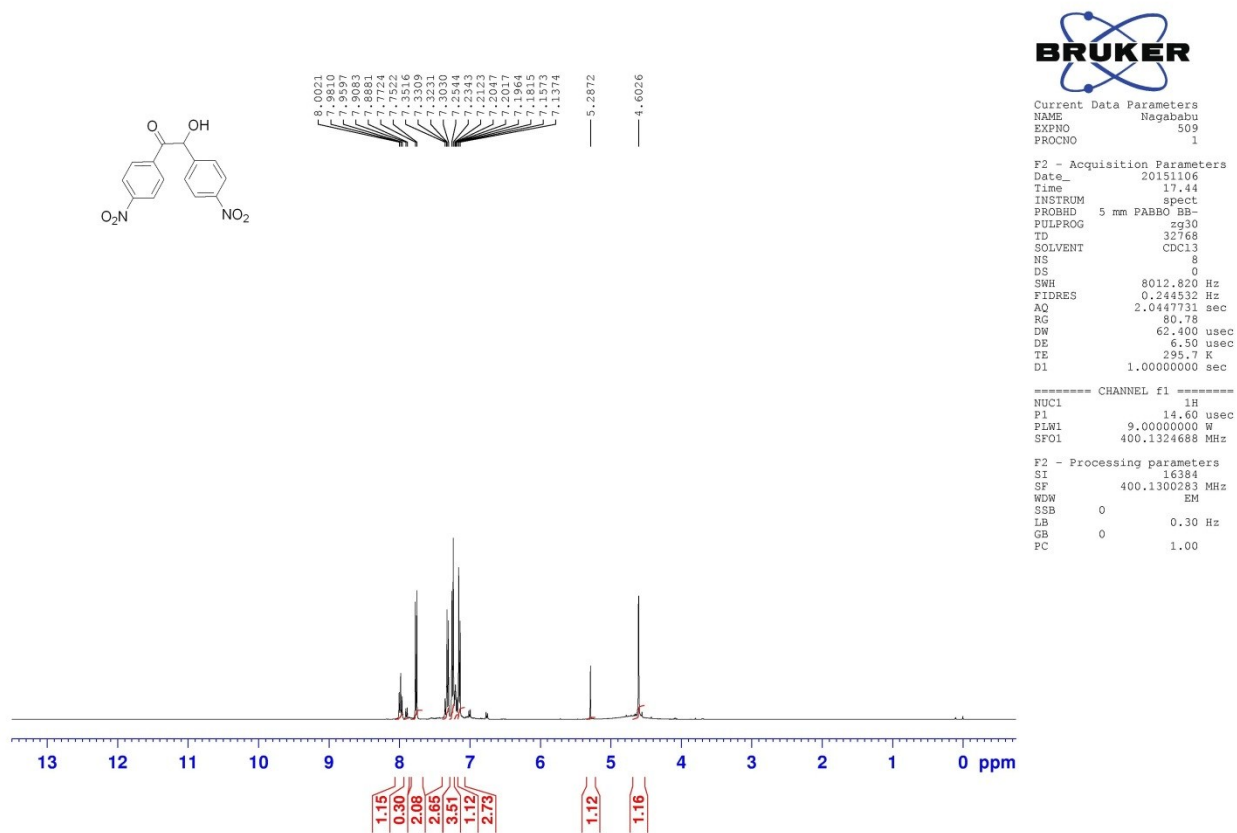

Figure S16. Table S2, Entry 1 Third run.

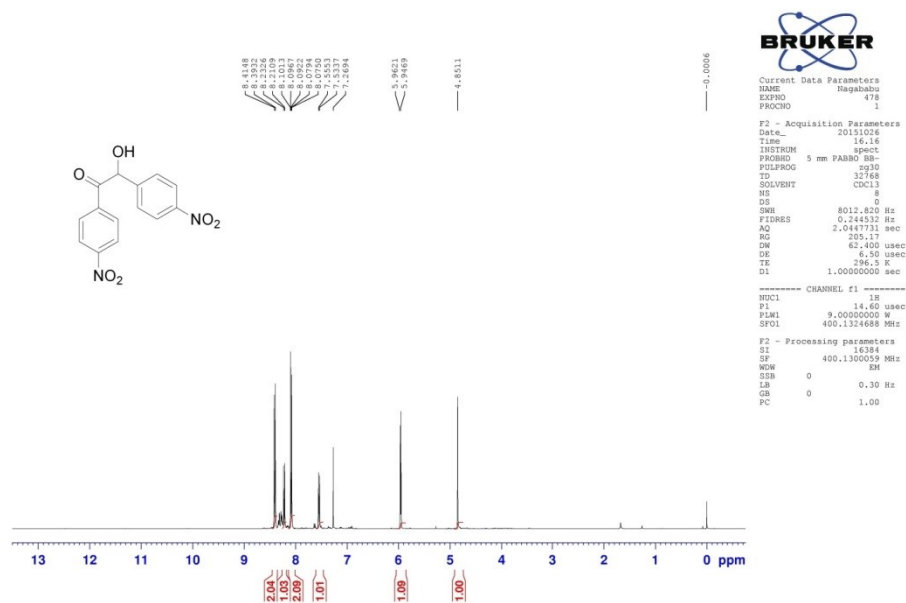

Figure S17. Table S2, Entry 2 First run.









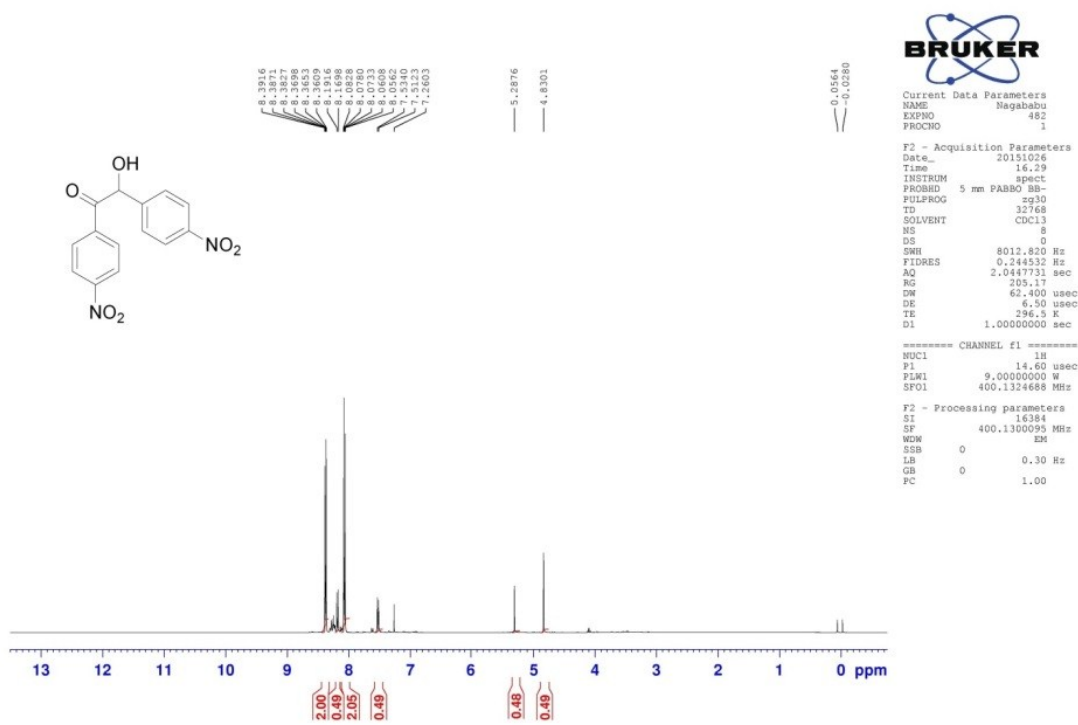

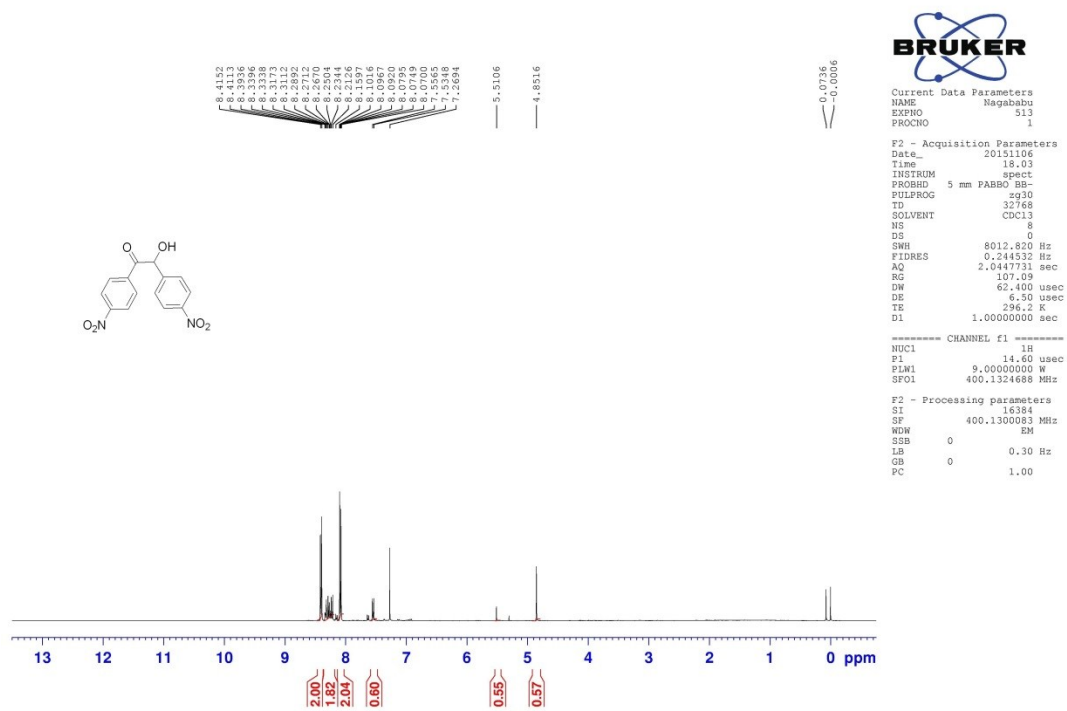

Figure S28. Table S2, Entry 5 Third run.
